# Supplementary material
Source: publisher figshare collection journal article supplement (https://rs.figshare.com/ndownloader/files/13247231)
Supplement: Supplementary file 1 [file 13247231]

## Sheet: ReadMe
*The first six tabs each display values for hypothalamic genes
*The last four tabs each display values for testicular genes
*Band # refers to the USFWS silver, metal band that each, individual bird was banded with
*Population refers to residents (Junco hyemalis carolinensis) and migrants (Junco hyemalis hyemalis)
*Hypothalamus reference genes were PPIA and GAPDH
*The testicular reference gene was RPL4
*For details on how qPCR assays were run, assay variation, etc. please see main text and supplementary materials
*Note: Hypothalamic genes were run so all individuals were on the same plate. Testicular genes were run so one plate had all genes from the same individual.

## Sheet: hypoGnRH3
Band #	POPULATION (resident=1, migrant=2)	GnRH Ct	PPIA Ct	GAPDH	ref av	del ref	del del ref	ratio ref
232170426	1	31.66	23.97	28.76	26.365	5.295	-2.1	4.28709
232170430	1	32.07	24.48	29.45	26.965	5.105	-2.29	4.89056
232170431	1	31.03	22.43	27.86	25.145	5.885	-1.51	2.8481
232170838	1	30.77	24.81	29.9	27.355	3.415	-3.98	15.7797
232170842	1	31.66	25.26	29.38	27.32	4.34	-3.055	8.31087
232170844	1	31.65	24.45	28.94	26.695	4.955	-2.44	5.42642
232170845	1	32.37	26.26	30.91	28.585	3.785	-3.61	12.2101
232170855	1	30.31	25.81	31.12	28.465	1.845	-5.55	46.8507
232170861	1	29.86	25.55	30.74	28.145	1.715	-5.68	51.2685
232170425	2	33.12	23.33	28.12	25.725	7.395	0	1
232170438	2	32.68	23.38	28.14	25.76	6.92	-0.475	1.38992
232170471	2	34.27	24.53	29.91	27.22	7.05	-0.345	1.27015
232170473	2	31.68	22.77	28.36	25.565	6.115	-1.28	2.42839
232170475	2	32.79	23.31	28.78	26.045	6.745	-0.65	1.56917
232170478	2	33.83	23.35	29.05	26.2	7.63	0.235	0.849685
232170815	2	34.34	25.81	29.81	27.81	6.53	-0.865	1.82134
232170817	2	33.26	24	29.88	26.94	6.32	-1.075	2.10672
232170833	2	32.41	23.55	29.38	26.465	5.945	-1.45	2.73208
232170837	2	33.92	24.25	29.57	26.91	7.01	-0.385	1.30586

## Sheet: hypoGnIH
Band #	POPULATION (resident=1, migrant=2)	GnIH Ct	PPIA Ct	GAPDH	ref av	del ref	del del ref	ratio ref
232170426	1	30.17	23.97	28.76	26.365	3.805	-1.04	2.05623
232170430	1	29.93	24.48	29.45	26.965	2.965	-1.88	3.68075
232170431	1	27.79	22.43	27.86	25.145	2.645	-2.2	4.59479
232170838	1	31.68	24.81	29.9	27.355	4.325	-0.52	1.43396
232170842	1	31.21	25.26	29.38	27.32	3.89	-0.955	1.93858
232170844	1	29.68	24.45	28.94	26.695	2.985	-1.86	3.63008
232170845	1	32.51	26.26	30.91	28.585	3.925	-0.92	1.89212
232170855	1	28.34	25.81	31.12	28.465	-0.125	-4.97	31.3414
232170861	1	29.79	25.55	30.74	28.145	1.645	-3.2	9.18959
232170425	2	30.57	23.33	28.12	25.725	4.845	0	1
232170438	2	29.62	23.38	28.14	25.76	3.86	-0.985	1.97931
232170471	2	29.77	24.53	29.91	27.22	2.55	-2.295	4.90754
232170473	2	28.67	22.77	28.36	25.565	3.105	-1.74	3.34035
232170475	2	28.41	23.31	28.78	26.045	2.365	-2.48	5.57897
232170478	2	30.13	23.35	29.05	26.2	3.93	-0.915	1.88557
232170815	2	33.61	25.81	29.81	27.81	5.8	0.955	0.515842
232170817	2	29.84	24	29.88	26.94	2.9	-1.945	3.85038
232170833	2	30.89	23.55	29.38	26.465	4.425	-0.42	1.33793
232170837	2	29.86	24.25	29.57	26.91	2.95	-1.895	3.71922

## Sheet: hypoAR
Band	POPULATION (resident=1, migrant=2)	AR Ct	PPIA Ct	GAPDH	ref av	del ref	del del ref	ratio ref
232170426	1	31.98	23.97	28.76	26.365	5.615	0.84	0.558644
232170430	1	32.11	24.48	29.45	26.965	5.145	0.37	0.773782
232170431	1	30.34	22.43	27.86	25.145	5.195	0.42	0.747425
232170838	1	32.85	24.81	29.9	27.355	5.495	0.72	0.607097
232170842	1	34.03	25.26	29.38	27.32	6.71	1.935	0.261521
232170844	1	32.11	24.45	28.94	26.695	5.415	0.64	0.641713
232170845	1	34.77	26.26	30.91	28.585	6.185	1.41	0.376312
232170855	1	34.73	25.81	31.12	28.465	6.265	1.49	0.356013
232170861	1	34.65	25.55	30.74	28.145	6.505	1.73	0.301452
232170425	2	30.5	23.33	28.12	25.725	4.775	0	1
232170438	2	30.86	23.38	28.14	25.76	5.1	0.325	0.798298
232170471	2	32.68	24.53	29.91	27.22	5.46	0.685	0.622006
232170473	2	30.73	22.77	28.36	25.565	5.165	0.39	0.76313
232170475	2	29.91	23.31	28.78	26.045	3.865	-0.91	1.87905
232170478	2	30.52	23.35	29.05	26.2	4.32	-0.455	1.37078
232170815	2	32.15	25.81	29.81	27.81	4.34	-0.435	1.35191
232170817	2	31.05	24	29.88	26.94	4.11	-0.665	1.58557
232170833	2	31.77	23.55	29.38	26.465	5.305	0.53	0.692555
232170837	2	32.03	24.25	29.57	26.91	5.12	0.345	0.787308

## Sheet: hypoER
Band #	POPULATION (resident=1, migrant=2)	ER Ct	PPIA Ct	GAPDH	ref av	del ref	del del ref	ratio ref
232170426	1	31.84	23.97	28.76	26.365	5.475	0.16	0.895025
232170430	1	32.55	24.48	29.45	26.965	5.585	0.27	0.82932
232170431	1	31.3	22.43	27.86	25.145	6.155	0.84	0.558644
232170838	1	33.44	24.81	29.9	27.355	6.085	0.77	0.586417
232170842	1	34.52	25.26	29.38	27.32	7.2	1.885	0.270744
232170844	1	33.31	24.45	28.94	26.695	6.615	1.3	0.406126
232170845	1	35.26	26.26	30.91	28.585	6.675	1.36	0.389582
232170855	1	35.3	25.81	31.12	28.465	6.835	1.52	0.348686
232170861	1	34.53	25.55	30.74	28.145	6.385	1.07	0.476319
232170425	2	31.04	23.33	28.12	25.725	5.315	0	1
232170438	2	31.52	23.38	28.14	25.76	5.76	0.445	0.734584
232170471	2	32.66	24.53	29.91	27.22	5.44	0.125	0.917004
232170473	2	31.39	22.77	28.36	25.565	5.825	0.51	0.702222
232170475	2	31.94	23.31	28.78	26.045	5.895	0.58	0.668964
232170478	2	31.83	23.35	29.05	26.2	5.63	0.315	0.803851
232170815	2	33.21	25.81	29.81	27.81	5.4	0.085	0.942785
232170817	2	31.65	24	29.88	26.94	4.71	-0.605	1.52098
232170833	2	32.17	23.55	29.38	26.465	5.705	0.39	0.76313
232170837	2	32.96	24.25	29.57	26.91	6.05	0.735	0.600818

## Sheet: hypoGR
Band #	POPULATION (resident=1, migrant=2)	GR Ct	PPIA Ct	GAPDH	ref av	del ref	del del ref	ratio ref
232170426	1	30.12	23.97	28.76	26.365	3.755	0.27	0.82932
232170430	1	30.33	24.48	29.45	26.965	3.365	-0.12	1.08673
232170431	1	28.56	22.43	27.86	25.145	3.415	-0.07	1.04972
232170838	1	31.14	24.81	29.9	27.355	3.785	0.3	0.812252
232170842	1	31.92	25.26	29.38	27.32	4.6	1.115	0.461691
232170844	1	30.64	24.45	28.94	26.695	3.945	0.46	0.726986
232170845	1	33.21	26.26	30.91	28.585	4.625	1.14	0.45376
232170855	1	32.34	25.81	31.12	28.465	3.875	0.39	0.76313
232170861	1	32.18	25.55	30.74	28.145	4.035	0.55	0.68302
232170425	2	29.21	23.33	28.12	25.725	3.485	0	1
232170438	2	29.56	23.38	28.14	25.76	3.8	0.315	0.803851
232170471	2	30.21	24.53	29.91	27.22	2.99	-0.495	1.40932
232170473	2	28.45	22.77	28.36	25.565	2.885	-0.6	1.51572
232170475	2	28.43	23.31	28.78	26.045	2.385	-1.1	2.14355
232170478	2	28.91	23.35	29.05	26.2	2.71	-0.775	1.71119
232170815	2	32.29	25.81	29.81	27.81	4.48	0.995	0.501736
232170817	2	30	24	29.88	26.94	3.06	-0.425	1.34257
232170833	2	31.18	23.55	29.38	26.465	4.715	1.23	0.426317
232170837	2	29.94	24.25	29.57	26.91	3.03	-0.455	1.37078

## Sheet: hypoMR
Band #	POPULATION (resident=1, migrant=2)	MR Ct	PPIA Ct	GAPDH	ref av	del ref	del del ref	ratio ref
232170426	1	30.32	23.97	28.76	26.365	3.955	0.3	0.812252
232170430	1	30.5	24.48	29.45	26.965	3.535	-0.12	1.08673
232170431	1	27.44	22.43	27.86	25.145	2.295	-1.36	2.56685
232170838	1	30.82	24.81	29.9	27.355	3.465	-0.19	1.14076
232170842	1	32.41	25.26	29.38	27.32	5.09	1.435	0.369847
232170844	1	30.32	24.45	28.94	26.695	3.625	-0.03	1.02101
232170845	1	33.19	26.26	30.91	28.585	4.605	0.95	0.517632
232170855	1	31.99	25.81	31.12	28.465	3.525	-0.13	1.09429
232170861	1	32.28	25.55	30.74	28.145	4.135	0.48	0.716978
232170425	2	29.38	23.33	28.12	25.725	3.655	0	1
232170438	2	29.52	23.38	28.14	25.76	3.76	0.105	0.929805
232170471	2	30.41	24.53	29.91	27.22	3.19	-0.465	1.38032
232170473	2	27.54	22.77	28.36	25.565	1.975	-1.68	3.20428
232170475	2	27.74	23.31	28.78	26.045	1.695	-1.96	3.89062
232170478	2	27.88	23.35	29.05	26.2	1.68	-1.975	3.93128
232170815	2	32.52	25.81	29.81	27.81	4.71	1.055	0.481297
232170817	2	29.18	24	29.88	26.94	2.24	-1.415	2.6666
232170833	2	28.77	23.55	29.38	26.465	2.305	-1.35	2.54912
232170837	2	29.59	24.25	29.57	26.91	2.68	-0.975	1.96564

## Sheet: testesGR
Band	POPULATION (resident=1, migrant=2)	GR Ct	RPL4	del ref	del del ref	ratio ref
232170426	1	26.15	20.85	5.3	-0.54	1.45397
232170430	1	27.19	21.58	5.61	-0.16	1.11729
232170431	1	27.955	22.07	5.885	-0.335	1.26138
232170438	1
232170842	1	25.91	20.535	5.375	-0.4	1.31951
232170844	1	27.26	21.64	5.62	-0.69	1.61328
232170845	1	27.43	21.765	5.665	-0.62	1.53688
232170855	1	27.02	21.235	5.785	0.01	0.993092
232170861	1	27.59	22.13	5.46	0.105	0.929805
232170425	2	29.865	23.06	6.805	0.985	0.505226
232170438	2	30.215	22.13	8.085	2.73	0.150726
232170471	2	28.71	21.25	7.46	1.24	0.423373
232170473	2	26.395	20.485	5.91	0.135	0.91067
232170475	2	28.78	20.63	8.15	2.31	0.20166
232170478	2	28.13	21.64	6.49	0.18	0.882703
232170815	2	27.775	21.565	6.21	0.855	0.552865
232170817	2	30.965	21.3	9.665	2.88	0.135842
232170833	2	27.495	21.32	6.175	0.405	0.755236
232170837	2	27.07	21.11	5.96	-0.325	1.25266
232170853	2	26.59	20.685	5.905	0.065	0.955945

## Sheet: testesMR
Band	POPULATION (resident=1, migrant=2)	MR Ct	RPL4	del ref	del del ref	ratio ref
232170426	1	28.975	20.85	8.125	0.505	0.70466
232170430	1	29.925	21.58	8.345	0.88	0.543367
232170431	1	28.735	22.07	6.665	-1.045	2.06337
232170438	1
232170842	1	27.45	20.535	6.915	-0.715	1.64148
232170844	1	29.775	21.64	8.135	0.215	0.861546
232170845	1	29.85	21.765	8.085	0.235	0.849685
232170855	1	29.505	21.235	8.27	0.64	0.641713
232170861	1	29.535	22.13	7.405	0.07	0.952638
232170425	2	31.2	23.06	8.14	0.415	0.750019
232170438	2	30.21	22.13	8.08	0.745	0.596668
232170471	2	29.17	21.25	7.92	0.21	0.864537
232170473	2	28.115	20.485	7.63	0	1
232170475	2	27.905	20.63	7.275	-0.345	1.27015
232170478	2	29.475	21.64	7.835	-0.085	1.06069
232170815	2	31.1	21.565	9.535	2.2	0.217638
232170817	2	32.365	21.3	11.065	3.32	0.100134
232170833	2	29.54	21.32	8.22	0.755	0.592546
232170837	2	29.5	21.11	8.39	0.54	0.687771
232170853	2	28.835	20.685	8.15	0.53	0.692555

## Sheet: testesLHR
Band	POPULATION (resident=1, migrant=2)	LHR Ct	RPL4 Ct	del ref	del del ref	ratio ref
232170426	1	27.16	20.85	6.31	-0.83	1.77769
232170430	1	28.725	21.58	7.145	0.64	0.641713
232170431	1	27.87	22.07	5.8	-0.22	1.16473
232170438
232170842	1	27.77	20.535	7.235	0.675	0.626332
232170844	1	29.115	21.64	7.475	0.625	0.64842
232170845	1	27.615	21.765	5.85	-1.03	2.04202
232170855	1	28.465	21.235	7.23	0.66	0.632878
232170861	1	29.155	22.13	7.025	0.725	0.604997
232170425	2	.	23.06	.	.	.
232170438	2	30.42	22.13	8.29	1.99	0.251739
232170471	2	28.335	21.25	7.085	1.065	0.477973
232170473	2	27.36	20.485	6.875	0.315	0.803851
232170475	2	28.115	20.63	7.485	0.345	0.787308
232170478	2	28.475	21.64	6.835	-0.015	1.01045
232170815	2	29.545	21.565	7.98	1.68	0.312083
232170817	2	28.72	21.3	7.42	0	1
232170833	2	28.175	21.32	6.855	0.35	0.784584
232170837	2	27.145	21.11	6.035	-0.845	1.79626
232170853	2	27.62	20.685	6.935	-0.205	1.15269

[truncated: 1 more sheets: testesFSH]
